# Supplementary material
Source: HighWire-hosted journal article supplement (https://erj.ersjournals.com/highwire/filestream/113527/field_highwire_adjunct_files/0/Supplementary_material_ERJ-00517-2011.pdf)
Supplement: Supplementary_material_ERJ-00517-2011.pdf [file Supplementary_material_ERJ-00517-2011.pdf]

*Online depository*

## **Canine scent detection in the diagnosis of lung cancer: Revisiting a puzzling phenomenon**

Rainer Ehmann<sup>1\*</sup>, Enole Boedeker<sup>2\*</sup>, Uwe Friedrich<sup>3</sup>, Jutta Sagert<sup>3</sup>, Jürgen Dippon<sup>4</sup>,  
Godehard Friedel<sup>2</sup>, Thorsten Walles<sup>2</sup>

*\*both authors contributed equally*

<sup>1</sup> *Ambulante Pneumologie, Rotebuehlplatz 19, 70178 Stuttgart, Germany.*

<sup>2</sup> *Department of General Thoracic Surgery, Schillerhoehe Hospital, Solitudestrasse 18, 70839 Gerlingen, Germany.*

<sup>3</sup> *TeamCanin, An der Burg 1, 79843 Loeffingen, Germany.*

<sup>4</sup> *Department of Mathematics, University of Stuttgart, Pfaffenwaldring 57, 70569 Stuttgart.*

Address correspondence to: **Thorsten Walles**, MD FETCS

Schillerhoehe Hospital

Department of Thoracic Surgery

Solitudestrasse 18

D-70839 Gerlingen, Germany

Phone: ++ 49-7156-203-2244

Fax: ++ 49-7156-203-2003

e-mail: Thorsten.Walles@klinik-schillerhoehe.de

**Table 6.** Diseases and drugs with an inhomogenous distribution among groups.

|                               | Group A   |          |           | <i>P</i> training vs test | Group B     |           |           | <i>P</i> training vs test | Group C   | <i>P</i> test groups A,B,C |
|-------------------------------|-----------|----------|-----------|---------------------------|-------------|-----------|-----------|---------------------------|-----------|----------------------------|
|                               | healthy   |          |           |                           | lung cancer |           |           |                           | COPD      |                            |
|                               | all       | training | test      |                           | all         | training  | test      |                           | test      |                            |
| <i>n</i>                      | 110       | 60       | 50        |                           | 60          | 35        | 25        |                           | 50        |                            |
| <b>diseases</b>               |           |          |           |                           |             |           |           |                           |           |                            |
| arterial hypertension (n / %) | 6 / 5.5   | 3 / 5.0  | 3 / 6.0   | n.s.                      | 31 / 51.7   | 20 / 57.1 | 11 / 44.0 | n.s.                      | 20 / 40.0 | <0.001                     |
| hypothyreosis (n / %)         | 17 / 15.5 | 4 / 6.7  | 13 / 26.0 | <0.01                     | 4 / 6.7     | 4 / 11.4  | 0 / 0     |                           | 4 / 8.0   | <0.01                      |
| cardiac arrythmias (n / %)    | 0 / 0     | 0 / 0    | 0 / 0     | n.s.                      | 2 / 3.3     | 2 / 5.7   | 0 / 0     |                           | 7 / 14.0  |                            |
| diabetes mellitus (n / %)     | 1 / 0.9   | 0 / 0    | 1 / 2.0   |                           | 14 / 23.3   | 9 / 25.7  | 5 / 20.0  |                           | 1 / 2.0   |                            |
| <b>drugs</b>                  |           |          |           |                           |             |           |           |                           |           |                            |
| Thyroxin (n / %)              | 17 / 15.5 | 4 / 6.7  | 13 / 26.0 | <0.01                     | 5 / 8.3     | 5 / 14.3  | 0 / 0     | n.s.                      | 5 / 10    | <0.01                      |
| Ramipril (n / %)              | 1 / 0.9   | 1 / 1.7  | 0 / 0     |                           | 15 / 25.0   | 12 / 34.3 | 3 / 12.0  |                           | 5 / 10.0  | <0.05                      |
| Telmisartan (n / %)           | 0 / 0     | 0 / 0    | 0 / 0     |                           | 2 / 3.3     | 0 / 0     | 2 / 8.0   |                           | 0 / 0     |                            |
| Tiotropiumbromide (n / %)     | 0 / 0     | 0 / 0    | 0 / 0     |                           | 4 / 6.7     | 1 / 2.9   | 3 / 12.0  |                           | 29 / 58.0 | <0.001                     |
| Ipratropiumbromide (n / %)    | 0 / 0     | 0 / 0    | 0 / 0     | 8 / 13.3                  | 8 / 22.9    | 0 / 0     | <0.05     | 11 / 22.0                 |           |                            |

|                        |         |         |         |           |          |          |         |          |           |        |
|------------------------|---------|---------|---------|-----------|----------|----------|---------|----------|-----------|--------|
| Fenoterol (n / %)      | 0 / 0   | 0 / 0   | 0 / 0   | n.s.      | 2 / 3.3  | 2 / 5.7  | 0 / 0   | n.s.     | 14 / 28.0 | <0.001 |
| Fluticason (n / %)     | 1 / 0.9 | 0 / 0   | 1 / 2.0 |           | 1 / 1.7  | 0 / 0    | 1 / 4.0 |          | 16 / 32.0 |        |
| Salmeterol (n / %)     | 1 / 0.9 | 0 / 0   | 1 / 2.0 |           | 4 / 6.7  | 3 / 8.6  | 1 / 4.0 |          | 16 / 32.0 |        |
| Budenosid (n / %)      | 0 / 0   | 0 / 0   | 0 / 0   |           | 3 / 5.0  | 3 / 8.6  | 0 / 0   |          | 8 / 16.0  |        |
| Formoterol (n / %)     | 0 / 0   | 0 / 0   | 0 / 0   |           | 5 / 8.3  | 3 / 8.6  | 2 / 8.0 |          | 17 / 34.0 |        |
| Beclomethason (n / %)  | 0 / 0   | 0 / 0   | 0 / 0   | 9 / 15.0  | 9 / 25.7 | 0 / 0    | <0.007  | 4 / 8.0  | n.s.      |        |
| Indacaterol (n / %)    | 0 / 0   | 0 / 0   | 0 / 0   | 0 / 0     | 0 / 0    | 0 / 0    | n.s.    | 5 / 10.0 | <0.05     |        |
| Salbutamol (n / %)     | 0 / 0   | 0 / 0   | 0 / 0   | 0 / 0     | 0 / 0    | 0 / 0    |         | 10 / 20  | <0.001    |        |
| Theophyllin (n / %)    | 0 / 0   | 0 / 0   | 0 / 0   | 2 / 3.3   | 2 / 5.7  | 0 / 0    |         | 7 / 14.0 | <0.01     |        |
| Prednisolon (n / %)    | 0 / 0   | 0 / 0   | 0 / 0   | 4 / 6.7   | 2 / 5.7  | 2 / 8.0  |         | 8 / 16.0 |           |        |
| Pantoprazol (n / %)    | 0 / 0   | 0 / 0   | 0 / 0   | 11 / 18.3 | 8 / 22.9 | 3 / 12.0 |         | 4 / 8.0  | <0.05     |        |
| ASS (n / %)            | 2 / 1.8 | 1 / 1.7 | 1 / 2.0 | 8 / 13.3  | 4 / 11.4 | 4 / 16.0 |         | 9 / 18.0 |           |        |
| Dihydrocodein (n / %)  | 0 / 0   | 0 / 0   | 0 / 0   | 2 / 3.3   | 0 / 0    | 2 / 8.0  |         | 0 / 0    |           |        |
| Codein (n / %)         | 0 / 0   | 0 / 0   | 0 / 0   | 5 / 8.3   | 2 / 8.0  | 2 / 8.0  |         | 0 / 0    |           |        |
| Enoxaparin (n / %)     | 0 / 0   | 0 / 0   | 0 / 0   | 3 / 5.0   | 0 / 0    | 3 / 12.0 |         | 0 / 0    | <0.01     |        |
| Metoclopramide (n / %) | 0 / 0   | 0 / 0   | 0 / 0   | 3 / 5.0   | 0 / 0    | 3 / 12.0 |         | 0 / 0    |           |        |

**Table 7.** Potential confounders in the mixed effects logistic regression analysis.

| <b>Drug</b>        | <b>Log Odds</b> | <b>Std. Error</b> | <b>z value</b> | <b><i>p value</i></b> |
|--------------------|-----------------|-------------------|----------------|-----------------------|
| Triotropiumbromide | -0.9689         | 0.4818            | -2.011         | 0.0443                |
| Clopidogrel        | 1.8028          | 0.8787            | 2.052          | 0.0402                |
| Enoxaparin         | -1.4351         | 0.6352            | -2.259         | 0.0239                |
| Ezetmib            | 2.3354          | 0.9158            | 2.550          | 0.0108                |
| Dihydrocodein      | -2.1972         | 0.8513            | -2.581         | 0.0099                |
| Marcumar           | 2.1116          | 0.7848            | 2.691          | 0.0071                |
| Metoprolol         | -1.9249         | 0.6455            | -2.982         | 0.0029                |
| Verapamil          | 2.5014          | 0.8062            | 3.103          | 0.0019                |
| MCP                | -2.3224         | 0.7136            | -3.255         | 0.0011                |

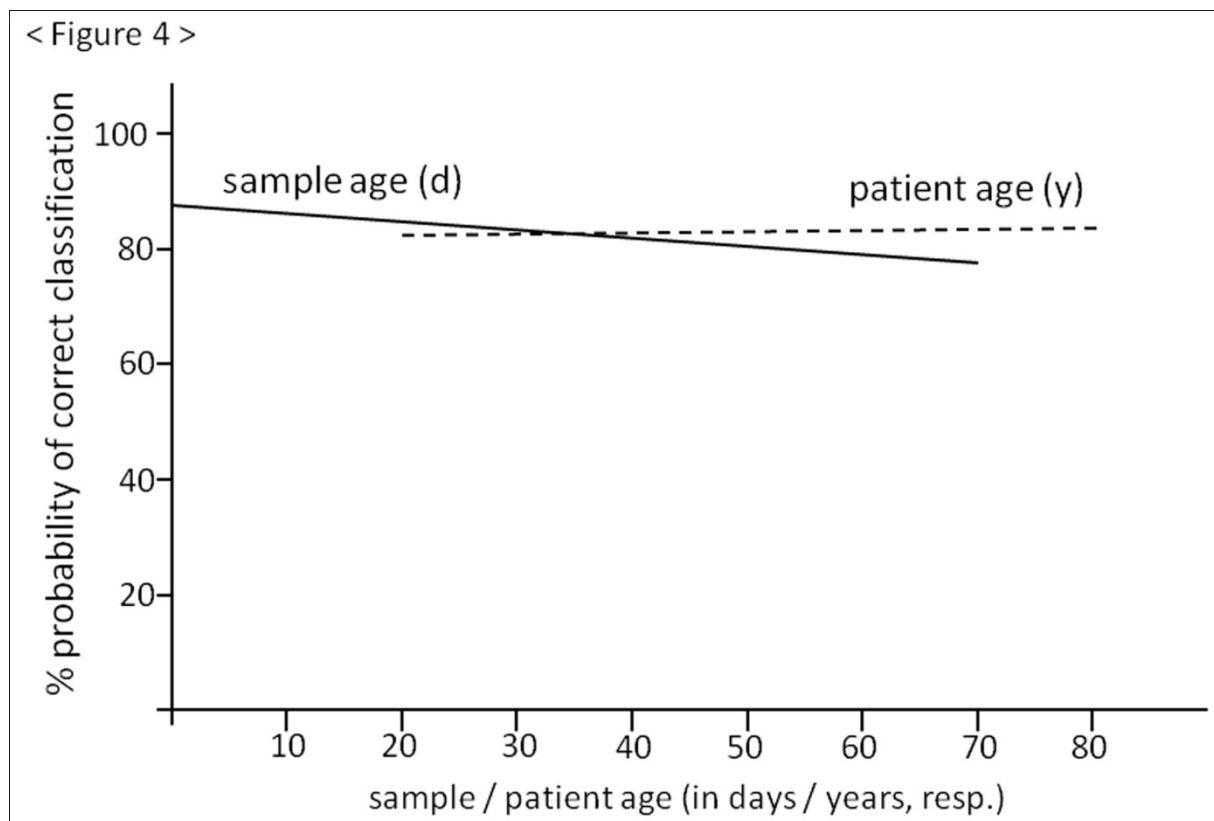

**Figure 4.** Logistic regression analysis of the influence of sample (continuous line,  $p=0.60$ ) and patient age (dashed line,  $p=0.88$ ) on probe classification
